# Supplementary material for: Insights on Pinna nobilis population genetic structure in the Aegean and Ionian Sea
Source: PeerJ. 2023 Nov 29;11:e16491. doi: 10.7717/peerj.16491 (PMC10693241; doi:10.7717/peerj.16491)
Supplement: Supplemental Information 9 [file peerj-11-16491-s009.xlsx]

## Sheet: Table S1
Supplementary Table 2: Accession numbers and location of publicly available sequences used for the analyses.
COI accession number	Location	16S rRNA accession number	Location
KY321791.1	Alicante, Spain
KY321790.1	Alicante, Spain
KY321789.1	Alicante, Spain
KY321788.1	Alicante, Spain
KY321778.1	Alicante, Spain
KY321792.1	Alicante, Spain
KY321793.1	Alicante, Spain
KY321800.1	Alicante, Spain
KY321801.1	Alicante, Spain
KY321796.1	Alicante, Spain
KY321787.1	Mallorca, Spain	KJ365721.1	Mallorca, Spain
KY321786.1	Mallorca, Spain	KJ365722.1	Mallorca, Spain
KY321785.1	Mallorca, Spain	KJ365723.1	Mallorca, Spain
KY321777.1	Mallorca, Spain	KJ365724.1	Mallorca, Spain
KY321776.1	Mallorca, Spain
KY321775.1	Mallorca, Spain
KY321774.1	Mallorca, Spain
KY321773.1	Mallorca, Spain
KY321805.1	Mallorca, Spain
KY321806.1	Mallorca, Spain
KY321784.1	Ibiza, Spain
KY321783.1	Ibiza, Spain
KY321768.1	Ibiza, Spain
KY321767.1	Ibiza, Spain
KY321766.1	Ibiza, Spain
KY321765.1	Ibiza, Spain
KY321764.1	Ibiza, Spain
KY321763.1	Ibiza, Spain
KY321762.1	Ibiza, Spain
KY321761.1	Ibiza, Spain
KY321771.1	Murcia, Spain
KY321770.1	Murcia, Spain
KY321769.1	Murcia, Spain
KY321772.1	Murcia, Spain
KY321795.1	Murcia, Spain
KY321804.1	Murcia, Spain
KY321809.1	Murcia, Spain
KY321810.1	Murcia, Spain
KY321811.1	Murcia, Spain
KY321782.1	Ebro, Spain
KY321781.1	Ebro, Spain
KY321780.1	Ebro, Spain
KY321760.1	Ebro, Spain
KY321759.1	Ebro, Spain
KY321758.1	Ebro, Spain
KY321794.1	Ebro, Spain
KY321802.1	Ebro, Spain
KY321803.1	Ebro, Spain
		KJ365719.1	Cabrera, Spain
		KJ365720.1	Cabrera, Spain
		KJ365717.1	Chafarinas, Spain
		KJ365725.1	Columbretes, Spain
KY321779.1	Banyuls, France
KY321757.1	Banyuls, France
KY321756.1	Banyuls, France
KY321755.1	Banyuls, France
KY321797.1	Banyuls, France
KY321798.1	Banyuls, France
KY321807.1	Banyuls, France
KY321808.1	Banyuls, France
KY321799.1	Banyuls, France
		KJ365716.1	Peyrefite, France
		KJ365718.1	Peyrefite, France
		KJ365743.1	Peyrefite, France
		KJ365744.1	Peyrefite, France
		KJ365745.1	Peyrefite, France
DQ448216.1	Epanomi-Thermaikos, Greece	DQ663473.1	Epanomi-Thermaikos, Greece
DQ448217.1	Epanomi-Thermaikos, Greece	DQ663473.1	Epanomi-Thermaikos, Greece
DQ448218.1	Epanomi-Thermaikos, Greece	DQ663473.1	Epanomi-Thermaikos, Greece
EF536832.1	Epanomi-Thermaikos, Greece	DQ663473.1	Epanomi-Thermaikos, Greece
EF536831.1	Epanomi-Thermaikos, Greece	DQ663473.1	Epanomi-Thermaikos, Greece
EF536830.1	Epanomi-Thermaikos, Greece	DQ663473.1	Epanomi-Thermaikos, Greece
EF536829.1	Epanomi-Thermaikos, Greece	DQ663473.1	Epanomi-Thermaikos, Greece
EF536828.1	Epanomi-Thermaikos, Greece	DQ663473.1	Epanomi-Thermaikos, Greece
EF536827.1	Epanomi-Thermaikos, Greece
EF536841.1	Aggelochori, Greece	DQ663473.1	Aggelochori, Greece
EF536840.1	Aggelochori, Greece	DQ663473.1	Aggelochori, Greece
EF536839.1	Aggelochori, Greece	DQ663473.1	Aggelochori, Greece
EF536838.1	Aggelochori, Greece	DQ663473.1	Aggelochori, Greece
EF536837.1	Aggelochori, Greece	DQ663473.1	Aggelochori, Greece
EF536836.1	Aggelochori, Greece	DQ663473.1	Aggelochori, Greece
EF536835.1	Aggelochori, Greece	DQ663473.1	Aggelochori, Greece
EF536834.1	Aggelochori, Greece	DQ663473.1	Aggelochori, Greece
EF536833.1	Aggelochori, Greece	DQ663473.1	Aggelochori, Greece
EF536849.1	Korinthiakos, Greece	DQ663473.1	Korinthiakos, Greece
EF536848.1	Korinthiakos, Greece	DQ663473.1	Korinthiakos, Greece
EF536847.1	Korinthiakos, Greece	DQ663473.1	Korinthiakos, Greece
EF536846.1	Chios, Greece	EF536855.1	Chios, Greece
EF536845.1	Chios, Greece	EF536855.1	Chios, Greece
EF536844.1	Chios, Greece	EF536855.1	Chios, Greece
EF536843.1	Chios, Greece	EF536855.1	Chios, Greece
EF536842.1	Chios, Greece	EF536855.1	Chios, Greece
JX855023.1	Cyprus	JX854787.1	Cyprus
JX855022.1	Cyprus	JX854786.1	Cyprus
HM998866.1	Stah Jaber, Tunisia
HM998858.1	Stah Jaber, Tunisia
HM998862.1	Stah Jaber, Tunisia
HM998862.1	Stah Jaber, Tunisia
HM998857.1	Stah Jaber, Tunisia
HM998857.1	Stah Jaber, Tunisia
HM998857.1	Stah Jaber, Tunisia
HM998857.1	Stah Jaber, Tunisia
HM998861.1	Stah Jaber, Tunisia
HM998865.1	Bizerta lagoon, Tunisia
HM998859.1	Bizerta lagoon, Tunisia
KF612603.1	Bizerta lagoon, Tunisia
HM998857.1	Bizerta lagoon, Tunisia
HM998857.1	Bizerta lagoon, Tunisia
HM998857.1	Bizerta lagoon, Tunisia
HM998861.1	Bizerta lagoon, Tunisia
HM998861.1	Bizerta lagoon, Tunisia
HM998860.1	El Ketef, Tunisia
HM998857.1	El Ketef, Tunisia
HM998857.1	El Ketef, Tunisia
HM998857.1	El Ketef, Tunisia
HM998861.1	El Ketef, Tunisia
HM998861.1	El Ketef, Tunisia
HM998861.1	El Ketef, Tunisia
HM998861.1	El Ketef, Tunisia
HM998861.1	El Ketef, Tunisia
HM998861.1	El Ketef, Tunisia
HM998861.1	El Ketef, Tunisia
HM998861.1	El Ketef, Tunisia
HM998861.1	El Ketef, Tunisia
HM998861.1	El Ketef, Tunisia
HM998861.1	El Ketef, Tunisia
HM998861.1	El Ketef, Tunisia
HM998861.1	El Ketef, Tunisia
HM998864.1	El Bibane Lagoon, Tunisia
HM998857.1	El Bibane Lagoon, Tunisia
HM998857.1	El Bibane Lagoon, Tunisia
HM998857.1	El Bibane Lagoon, Tunisia
HM998857.1	El Bibane Lagoon, Tunisia
HM998861.1	El Bibane Lagoon, Tunisia
HM998861.1	El Bibane Lagoon, Tunisia
HM998861.1	El Bibane Lagoon, Tunisia
HM998861.1	El Bibane Lagoon, Tunisia
HM998863.1	Kerkannah Island, Tunisia
HM998861.1	Kerkannah Island, Tunisia
HM998857.1	Kerkannah Island, Tunisia
HM998857.1	Kerkannah Island, Tunisia
HM998857.1	Kerkannah Island, Tunisia
HM998857.1	Kerkannah Island, Tunisia
HM998861.1	Kerkannah Island, Tunisia
JX855021.1	Venice lagoon, Italy	JX854785.1	Venice lagoon, Italy
JX855020.1	Venice lagoon, Italy	JX854784.1	Venice lagoon, Italy
JX855019.1	Venice lagoon, Italy	JX854783.1	Venice lagoon, Italy
JX855018.1	Venice lagoon, Italy	JX854782.1	Venice lagoon, Italy
JX855017.1	Venice lagoon, Italy	JX854781.1	Venice lagoon, Italy
JX855016.1	Venice lagoon, Italy	JX854780.1	Venice lagoon, Italy
JX855015.1	Venice lagoon, Italy	JX854779.1	Venice lagoon, Italy
JX855014.1	Venice lagoon, Italy	JX854778.1	Venice lagoon, Italy
JX855013.1	Venice lagoon, Italy	JX854777.1	Venice lagoon, Italy
JX855012.1	Venice lagoon, Italy	JX854776.1	Venice lagoon, Italy
JX855011.1	Venice lagoon, Italy	JX854775.1	Venice lagoon, Italy
JX855010.1	Venice lagoon, Italy	JX854774.1	Venice lagoon, Italy
JX855009.1	Venice lagoon, Italy	JX854773.1	Venice lagoon, Italy
JX855008.1	Venice lagoon, Italy	JX854772.1	Venice lagoon, Italy
JX855007.1	Venice lagoon, Italy	JX854771.1	Venice lagoon, Italy
JX855006.1	Venice lagoon, Italy	JX854770.1	Venice lagoon, Italy
JX855005.1	Venice lagoon, Italy	JX854769.1	Venice lagoon, Italy
JX855004.1	Venice lagoon, Italy	JX854768.1	Venice lagoon, Italy
JX855003.1	Venice lagoon, Italy	JX854767.1	Venice lagoon, Italy
JX855002.1	Venice lagoon, Italy	JX854766.1	Venice lagoon, Italy
JX855001.1	Capo Enfola, Elba Island, Italy	JX854765.1	Capo Enfola, Elba Island, Italy
JX855000.1	Capo Enfola, Elba Island, Italy	JX854764.1	Capo Enfola, Elba Island, Italy
JX854999.1	Capo Enfola, Elba Island, Italy	JX854763.1	Capo Enfola, Elba Island, Italy
JX854998.1	Capo Enfola, Elba Island, Italy	JX854762.1	Capo Enfola, Elba Island, Italy
JX854997.1	Capo Enfola, Elba Island, Italy	JX854761.1	Capo Enfola, Elba Island, Italy
JX854996.1	Capo Enfola, Elba Island, Italy	JX854760.1	Capo Enfola, Elba Island, Italy
JX854995.1	Capo Enfola, Elba Island, Italy	JX854759.1	Capo Enfola, Elba Island, Italy
JX854994.1	Capo Enfola, Elba Island, Italy	JX854758.1	Capo Enfola, Elba Island, Italy
JX854993.1	Capo Enfola, Elba Island, Italy	JX854757.1	Capo Enfola, Elba Island, Italy
JX854992.1	Capo Enfola, Elba Island, Italy	JX854756.1	Capo Enfola, Elba Island, Italy
JX854991.1	Ognina, Sicily, Italy	JX854755.1	Ognina, Sicily, Italy
JX854990.1	Ognina, Sicily, Italy	JX854754.1	Ognina, Sicily, Italy
JX854989.1	Ognina, Sicily, Italy	JX854753.1	Ognina, Sicily, Italy
JX854988.1	Ognina, Sicily, Italy	JX854752.1	Ognina, Sicily, Italy
JX854987.1	Ognina, Sicily, Italy	JX854751.1	Ognina, Sicily, Italy
JX854986.1	Ognina, Sicily, Italy	JX854750.1	Ognina, Sicily, Italy
JX854985.1	Ognina, Sicily, Italy	JX854749.1	Ognina, Sicily, Italy
JX854984.1	Ognina, Sicily, Italy	JX854748.1	Ognina, Sicily, Italy
JX854983.1	Ognina, Sicily, Italy	JX854747.1	Ognina, Sicily, Italy
JX854982.1	Ognina, Sicily, Italy	JX854746.1	Ognina, Sicily, Italy
JX854981.1	Ognina, Sicily, Italy	JX854745.1	Ognina, Sicily, Italy
JX854980.1	Ognina, Sicily, Italy	JX854744.1	Ognina, Sicily, Italy
JX854979.1	Ognina, Sicily, Italy	JX854743.1	Ognina, Sicily, Italy
JX854978.1	Ognina, Sicily, Italy	JX854742.1	Ognina, Sicily, Italy
JX854977.1	Ognina, Sicily, Italy	JX854741.1	Ognina, Sicily, Italy
JX854976.1	Pachino, Sicily, Italy	JX854740.1	Pachino, Sicily, Italy
JX854975.1	Pachino, Sicily, Italy	JX854739.1	Pachino, Sicily, Italy
JX854974.1	Pachino, Sicily, Italy	JX854738.1	Pachino, Sicily, Italy
JX854973.1	Pachino, Sicily, Italy	JX854737.1	Pachino, Sicily, Italy
JX854972.1	Pachino, Sicily, Italy	JX854736.1	Pachino, Sicily, Italy
JX854971.1	Pachino, Sicily, Italy	JX854735.1	Pachino, Sicily, Italy
JX854970.1	Pachino, Sicily, Italy	JX854734.1	Pachino, Sicily, Italy
JX854969.1	Pachino, Sicily, Italy	JX854733.1	Pachino, Sicily, Italy
JX854968.1	Milazzo, Sicily, Italy	JX854732.1	Milazzo, Sicily, Italy
JX854967.1	Milazzo, Sicily, Italy	JX854731.1	Milazzo, Sicily, Italy
JX854966.1	Milazzo, Sicily, Italy	JX854730.1	Milazzo, Sicily, Italy
JX854965.1	Milazzo, Sicily, Italy	JX854729.1	Milazzo, Sicily, Italy
JX854964.1	Milazzo, Sicily, Italy	JX854728.1	Milazzo, Sicily, Italy
JX854963.1	Milazzo, Sicily, Italy	JX854727.1	Milazzo, Sicily, Italy
JX854962.1	Milazzo, Sicily, Italy	JX854726.1	Milazzo, Sicily, Italy
JX854961.1	Milazzo, Sicily, Italy	JX854725.1	Milazzo, Sicily, Italy
JX854960.1	Milazzo, Sicily, Italy	JX854724.1	Milazzo, Sicily, Italy
JX854959.1	Milazzo, Sicily, Italy
JX854958.1	Mondello, Sicily, Italy	JX854723.1	Mondello, Sicily, Italy
JX854957.1	Mondello, Sicily, Italy	JX854722.1	Mondello, Sicily, Italy
JX854956.1	Mondello, Sicily, Italy	JX854721.1	Mondello, Sicily, Italy
JX854955.1	Mondello, Sicily, Italy	JX854720.1	Mondello, Sicily, Italy
JX854954.1	Mondello, Sicily, Italy	JX854719.1	Mondello, Sicily, Italy
JX854953.1	Mondello, Sicily, Italy	JX854718.1	Mondello, Sicily, Italy
JX854952.1	Mondello, Sicily, Italy	JX854717.1	Mondello, Sicily, Italy
JX854951.1	Mondello, Sicily, Italy	JX854716.1	Mondello, Sicily, Italy
JX854950.1	Mondello, Sicily, Italy	JX854715.1	Mondello, Sicily, Italy
JX854949.1	Mondello, Sicily, Italy	JX854714.1	Mondello, Sicily, Italy
JX854948.1	Mondello, Sicily, Italy	JX854713.1	Mondello, Sicily, Italy
		KC811480.1	Messina, Sicily, Italy
		KC811479.1	Messina, Sicily, Italy
JX854947.1	San Vito lo Capo, Sicily, Italy	JX854712.1	San Vito lo Capo, Sicily, Italy
JX854946.1	San Vito lo Capo, Sicily, Italy	JX854711.1	San Vito lo Capo, Sicily, Italy
JX854945.1	San Vito lo Capo, Sicily, Italy	JX854710.1	San Vito lo Capo, Sicily, Italy
JX854944.1	San Vito lo Capo, Sicily, Italy	JX854709.1	San Vito lo Capo, Sicily, Italy
JX854943.1	San Vito lo Capo, Sicily, Italy	JX854708.1	San Vito lo Capo, Sicily, Italy
JX854942.1	San Vito lo Capo, Sicily, Italy	JX854707.1	San Vito lo Capo, Sicily, Italy
JX854941.1	San Vito lo Capo, Sicily, Italy	JX854706.1	San Vito lo Capo, Sicily, Italy
JX854940.1	Cala Pesciu Cane, Corsica, France	JX854705.1	Cala Pesciu Cane, Corsica, France
JX854939.1	Cala Pesciu Cane, Corsica, France	JX854704.1	Cala Pesciu Cane, Corsica, France
JX854938.1	Cala Pesciu Cane, Corsica, France	JX854703.1	Cala Pesciu Cane, Corsica, France
JX854937.1	Cala Pesciu Cane, Corsica, France	JX854702.1	Cala Pesciu Cane, Corsica, France
JX854936.1	Cala Pesciu Cane, Corsica, France	JX854701.1	Cala Pesciu Cane, Corsica, France
JX854935.1	Cala Pesciu Cane, Corsica, France	JX854700.1	Cala Pesciu Cane, Corsica, France
JX854934.1	Cala Pesciu Cane, Corsica, France	JX854699.1	Cala Pesciu Cane, Corsica, France
JX854933.1	Cala Pesciu Cane, Corsica, France	JX854698.1	Cala Pesciu Cane, Corsica, France
JX854932.1	Cala Pesciu Cane, Corsica, France	JX854697.1	Cala Pesciu Cane, Corsica, France
JX854931.1	Cala Pesciu Cane, Corsica, France	JX854696.1	Cala Pesciu Cane, Corsica, France
JX854930.1	Cala Pesciu Cane, Corsica, France	JX854695.1	Cala Pesciu Cane, Corsica, France
JX854929.1	Cala Pesciu Cane, Corsica, France	JX854694.1	Cala Pesciu Cane, Corsica, France
		JX854693.1	Cala Pesciu Cane, Corsica, France
JX854928.1	Isola Piana, Corsica, France	JX854692.1	Isola Piana, Corsica, France
JX854927.1	Isola Piana, Corsica, France	JX854691.1	Isola Piana, Corsica, France
JX854926.1	Isola Piana, Corsica, France	JX854690.1	Isola Piana, Corsica, France
JX854925.1	Isola Piana, Corsica, France	JX854689.1	Isola Piana, Corsica, France
JX854924.1	Isola Piana, Corsica, France	JX854688.1	Isola Piana, Corsica, France
JX854923.1	Isola Piana, Corsica, France	JX854687.1	Isola Piana, Corsica, France
JX854922.1	Isola Piana, Corsica, France	JX854686.1	Isola Piana, Corsica, France
JX854921.1	Isola Piana, Corsica, France	JX854685.1	Isola Piana, Corsica, France
JX854920.1	Isola Piana, Corsica, France	JX854684.1	Isola Piana, Corsica, France
JX854919.1	Isola Piana, Corsica, France	JX854683.1	Isola Piana, Corsica, France
JX854918.1	Isola Piana, Corsica, France	JX854682.1	Isola Piana, Corsica, France
JX854917.1	Isola Piana, Corsica, France	JX854681.1	Isola Piana, Corsica, France
JX854916.1	Isola Piana, Corsica, France	JX854680.1	Isola Piana, Corsica, France
		JX854679.1	Isola Piana, Corsica, France
		JX854678.1	Isola Piana, Corsica, France
JX854915.1	Isola di La Maddalena, Sardinia, Italy	JX854677.1	Isola di La Maddalena, Sardinia, Italy
JX854914.1	Isola di La Maddalena, Sardinia, Italy	JX854676.1	Isola di La Maddalena, Sardinia, Italy
JX854913.1	Isola di La Maddalena, Sardinia, Italy	JX854675.1	Isola di La Maddalena, Sardinia, Italy
JX854912.1	Isola di La Maddalena, Sardinia, Italy	JX854674.1	Isola di La Maddalena, Sardinia, Italy
JX854911.1	Isola di La Maddalena, Sardinia, Italy	JX854673.1	Isola di La Maddalena, Sardinia, Italy
JX854910.1	Isola di La Maddalena, Sardinia, Italy	JX854672.1	Isola di La Maddalena, Sardinia, Italy
JX854909.1	Isola di La Maddalena, Sardinia, Italy	JX854671.1	Isola di La Maddalena, Sardinia, Italy
JX854908.1	Isola di La Maddalena, Sardinia, Italy	JX854670.1	Isola di La Maddalena, Sardinia, Italy
JX854907.1	Isola di La Maddalena, Sardinia, Italy	JX854669.1	Isola di La Maddalena, Sardinia, Italy
JX854906.1	Isola di La Maddalena, Sardinia, Italy	JX854668.1	Isola di La Maddalena, Sardinia, Italy
JX854905.1	Isola di La Maddalena, Sardinia, Italy	JX854667.1	Isola di La Maddalena, Sardinia, Italy
JX854904.1	Isola di La Maddalena, Sardinia, Italy	JX854666.1	Isola di La Maddalena, Sardinia, Italy
JX854903.1	Isola di La Maddalena, Sardinia, Italy	JX854665.1	Isola di La Maddalena, Sardinia, Italy
JX854902.1	Isola di La Maddalena, Sardinia, Italy	JX854664.1	Isola di La Maddalena, Sardinia, Italy
JX854901.1	Isola di La Maddalena, Sardinia, Italy	JX854663.1	Isola di La Maddalena, Sardinia, Italy
JX854900.1	Isola di La Maddalena, Sardinia, Italy	JX854662.1	Isola di La Maddalena, Sardinia, Italy
JX854899.1	Isola di La Maddalena, Sardinia, Italy	JX854661.1	Isola di La Maddalena, Sardinia, Italy
JX854898.1	Isola di La Maddalena, Sardinia, Italy	JX854660.1	Isola di La Maddalena, Sardinia, Italy
JX854897.1	Costa Paradiso, Sardinia, Italy	JX854636.1	Costa Paradiso, Sardinia, Italy
JX854896.1	Costa Paradiso, Sardinia, Italy	JX854635.1	Costa Paradiso, Sardinia, Italy
JX854895.1	Costa Paradiso, Sardinia, Italy	JX854634.1	Costa Paradiso, Sardinia, Italy
JX854894.1	Costa Paradiso, Sardinia, Italy	JX854633.1	Costa Paradiso, Sardinia, Italy
JX854893.1	Costa Paradiso, Sardinia, Italy	JX854632.1	Costa Paradiso, Sardinia, Italy
JX854892.1	Villasimius, Sardinia, Italy	JX854659.1	Villasimius, Sardinia, Italy
JX854891.1	Villasimius, Sardinia, Italy	JX854658.1	Villasimius, Sardinia, Italy
JX854890.1	Villasimius, Sardinia, Italy	JX854657.1	Villasimius, Sardinia, Italy
JX854889.1	Villasimius, Sardinia, Italy	JX854656.1	Villasimius, Sardinia, Italy
JX854888.1	Isola di Mal di Ventre, Sardinia, Italy	JX854655.1	Isola di Mal di Ventre, Sardinia, Italy
JX854887.1	Isola di Mal di Ventre, Sardinia, Italy	JX854654.1	Isola di Mal di Ventre, Sardinia, Italy
JX854886.1	Isola di Mal di Ventre, Sardinia, Italy	JX854653.1	Isola di Mal di Ventre, Sardinia, Italy
JX854885.1	Isola di Mal di Ventre, Sardinia, Italy	JX854652.1	Isola di Mal di Ventre, Sardinia, Italy
JX854884.1	Marceddi, Sardinia, Italy	JX854651.1	Marceddi, Sardinia, Italy
JX854883.1	Marceddi, Sardinia, Italy	JX854650.1	Marceddi, Sardinia, Italy
JX854882.1	Marceddi, Sardinia, Italy	JX854649.1	Marceddi, Sardinia, Italy
JX854881.1	Marceddi, Sardinia, Italy	JX854648.1	Marceddi, Sardinia, Italy
JX854880.1	Marceddi, Sardinia, Italy	JX854647.1	Marceddi, Sardinia, Italy
JX854879.1	Oristano, Sardinia, Italy	JX854646.1	Oristano, Sardinia, Italy
JX854878.1	Oristano, Sardinia, Italy	JX854645.1	Oristano, Sardinia, Italy
JX854877.1	Oristano, Sardinia, Italy	JX854644.1	Oristano, Sardinia, Italy
JX854876.1	Oristano, Sardinia, Italy	JX854643.1	Oristano, Sardinia, Italy
JX854875.1	Oristano, Sardinia, Italy	JX854642.1	Oristano, Sardinia, Italy
JX854874.1	Oristano, Sardinia, Italy	JX854641.1	Oristano, Sardinia, Italy
JX854873.1	Oristano, Sardinia, Italy	JX854640.1	Oristano, Sardinia, Italy
JX854872.1	Oristano, Sardinia, Italy	JX854639.1	Oristano, Sardinia, Italy
JX854871.1	Oristano, Sardinia, Italy	JX854638.1	Oristano, Sardinia, Italy
JX854870.1	Oristano, Sardinia, Italy	JX854637.1	Oristano, Sardinia, Italy
JX854869.1	Porto Ottiolu, Sardinia, Italy	JX854631.1	Porto Ottiolu, Sardinia, Italy
JX854868.1	Porto Ottiolu, Sardinia, Italy	JX854630.1	Porto Ottiolu, Sardinia, Italy
JX854867.1	Porto Ottiolu, Sardinia, Italy	JX854629.1	Porto Ottiolu, Sardinia, Italy
JX854866.1	Porto Ottiolu, Sardinia, Italy	JX854628.1	Porto Ottiolu, Sardinia, Italy
JX854865.1	Porto Ottiolu, Sardinia, Italy	JX854627.1	Porto Ottiolu, Sardinia, Italy
JX854864.1	Monte Petrosu, Sardinia, Italy	JX854621.1	Monte Petrosu, Sardinia, Italy
JX854863.1	Monte Petrosu, Sardinia, Italy	JX854620.1	Monte Petrosu, Sardinia, Italy
JX854862.1	Monte Petrosu, Sardinia, Italy	JX854619.1	Monte Petrosu, Sardinia, Italy
JX854861.1	Monte Petrosu, Sardinia, Italy	JX854618.1	Monte Petrosu, Sardinia, Italy
JX854860.1	Le Saline, Sardinia, Italy	JX854626.1	Le Saline, Sardinia, Italy
JX854859.1	Le Saline, Sardinia, Italy	JX854625.1	Le Saline, Sardinia, Italy
JX854858.1	Le Saline, Sardinia, Italy	JX854624.1	Le Saline, Sardinia, Italy
JX854857.1	Le Saline, Sardinia, Italy	JX854623.1	Le Saline, Sardinia, Italy
JX854856.1	Le Saline, Sardinia, Italy	JX854622.1	Le Saline, Sardinia, Italy
JX854855.1	Capo Ceraso, Sardinia, Italy	JX854617.1	Capo Ceraso, Sardinia, Italy
JX854854.1	Capo Ceraso, Sardinia, Italy	JX854616.1	Capo Ceraso, Sardinia, Italy
JX854853.1	Capo Ceraso, Sardinia, Italy	JX854615.1	Capo Ceraso, Sardinia, Italy
JX854852.1	Capo Ceraso, Sardinia, Italy	JX854614.1	Capo Ceraso, Sardinia, Italy
JX854851.1	Capo Ceraso, Sardinia, Italy	JX854613.1	Capo Ceraso, Sardinia, Italy
JX854850.1	Capo Ceraso, Sardinia, Italy	JX854612.1	Capo Ceraso, Sardinia, Italy
JX854849.1	Capo Ceraso, Sardinia, Italy	JX854611.1	Capo Ceraso, Sardinia, Italy
JX854848.1	Capo Ceraso, Sardinia, Italy	JX854610.1	Capo Ceraso, Sardinia, Italy
JX854847.1	Capo Ceraso, Sardinia, Italy	JX854609.1	Capo Ceraso, Sardinia, Italy
JX854846.1	Capo Ceraso, Sardinia, Italy	JX854608.1	Capo Ceraso, Sardinia, Italy
JX854845.1	Capo Ceraso, Sardinia, Italy	JX854607.1	Capo Ceraso, Sardinia, Italy
JX854844.1	Capo Ceraso, Sardinia, Italy	JX854606.1	Capo Ceraso, Sardinia, Italy
JX854843.1	Capo Ceraso, Sardinia, Italy
JX854831.1	Ospedale Marino, Sardinia, Italy	JX854595.1	Ospedale Marino, Sardinia, Italy
JX854830.1	Ospedale Marino, Sardinia, Italy	JX854594.1	Ospedale Marino, Sardinia, Italy
JX854829.1	Ospedale Marino, Sardinia, Italy	JX854593.1	Ospedale Marino, Sardinia, Italy
JX854828.1	Ospedale Marino, Sardinia, Italy	JX854592.1	Ospedale Marino, Sardinia, Italy
JX854827.1	Ospedale Marino, Sardinia, Italy	JX854591.1	Ospedale Marino, Sardinia, Italy
JX854826.1	Ospedale Marino, Sardinia, Italy	JX854590.1	Ospedale Marino, Sardinia, Italy
JX854825.1	Ospedale Marino, Sardinia, Italy	JX854589.1	Ospedale Marino, Sardinia, Italy
JX854824.1	Ospedale Marino, Sardinia, Italy	JX854588.1	Ospedale Marino, Sardinia, Italy
JX854823.1	Ospedale Marino, Sardinia, Italy	JX854587.1	Ospedale Marino, Sardinia, Italy
JX854822.1	Ospedale Marino, Sardinia, Italy	JX854586.1	Ospedale Marino, Sardinia, Italy
JX854821.1	Ospedale Marino, Sardinia, Italy	JX854585.1	Ospedale Marino, Sardinia, Italy
JX854820.1	Ospedale Marino, Sardinia, Italy	JX854584.1	Ospedale Marino, Sardinia, Italy
JX854819.1	Ospedale Marino, Sardinia, Italy	JX854583.1	Ospedale Marino, Sardinia, Italy
JX854818.1	Ospedale Marino, Sardinia, Italy	JX854582.1	Ospedale Marino, Sardinia, Italy
JX854817.1	Ospedale Marino, Sardinia, Italy	JX854581.1	Ospedale Marino, Sardinia, Italy
JX854816.1	Ospedale Marino, Sardinia, Italy	JX854580.1	Ospedale Marino, Sardinia, Italy
JX854815.1	Ospedale Marino, Sardinia, Italy	JX854579.1	Ospedale Marino, Sardinia, Italy
JX854814.1	Ospedale Marino, Sardinia, Italy	JX854578.1	Ospedale Marino, Sardinia, Italy
JX854813.1	Ospedale Marino, Sardinia, Italy	JX854577.1	Ospedale Marino, Sardinia, Italy
JX854812.1	Ospedale Marino, Sardinia, Italy	JX854576.1	Ospedale Marino, Sardinia, Italy
JX854811.1	Ospedale Marino, Sardinia, Italy	JX854575.1	Ospedale Marino, Sardinia, Italy
JX854810.1	Lazzaretto, Sardinia, Italy	JX854574.1	Lazzaretto, Sardinia, Italy
JX854809.1	Lazzaretto, Sardinia, Italy	JX854573.1	Lazzaretto, Sardinia, Italy
JX854842.1	Molara, Sardinia, Italy	JX854605.1	Molara, Sardinia, Italy
JX854841.1	Molara, Sardinia, Italy	JX854604.1	Molara, Sardinia, Italy
JX854840.1	Molara, Sardinia, Italy	JX854603.1	Molara, Sardinia, Italy
JX854839.1	Molara, Sardinia, Italy	JX854602.1	Molara, Sardinia, Italy
JX854838.1	Molara, Sardinia, Italy	JX854601.1	Molara, Sardinia, Italy
JX854837.1	Molara, Sardinia, Italy	JX854600.1	Molara, Sardinia, Italy
JX854836.1	Molara, Sardinia, Italy	JX854599.1	Molara, Sardinia, Italy
JX854835.1	Molara, Sardinia, Italy	JX854598.1	Molara, Sardinia, Italy
JX854834.1	Molara, Sardinia, Italy	JX854597.1	Molara, Sardinia, Italy
JX854833.1	Molara, Sardinia, Italy	JX854596.1	Molara, Sardinia, Italy
JX854832.1	Molara, Sardinia, Italy
JX854808.1	Torre del Porticciolo, Sardinia, Italy	JX854572.1	Torre del Porticciolo, Sardinia, Italy
JX854807.1	Torre del Porticciolo, Sardinia, Italy	JX854571.1	Torre del Porticciolo, Sardinia, Italy
JX854806.1	Torre del Porticciolo, Sardinia, Italy
JX854805.1	Baia di Porto Conte, Sardinia, Italy	JX854570.1	Baia di Porto Conte, Sardinia, Italy
JX854804.1	Baia di Porto Conte, Sardinia, Italy	JX854569.1	Baia di Porto Conte, Sardinia, Italy
JX854803.1	Baia di Porto Conte, Sardinia, Italy	JX854568.1	Baia di Porto Conte, Sardinia, Italy
JX854802.1	Baia di Porto Conte, Sardinia, Italy	JX854567.1	Baia di Porto Conte, Sardinia, Italy
JX854801.1	Baia di Porto Conte, Sardinia, Italy	JX854566.1	Baia di Porto Conte, Sardinia, Italy
JX854800.1	Baia di Porto Conte, Sardinia, Italy	JX854563.1	Baia di Porto Conte, Sardinia, Italy
JX854799.1	Baia di Porto Conte, Sardinia, Italy	JX854562.1	Baia di Porto Conte, Sardinia, Italy
JX854798.1	Baia di Porto Conte, Sardinia, Italy	JX854565.1	Baia di Porto Conte, Sardinia, Italy
JX854797.1	Baia di Porto Conte, Sardinia, Italy	JX854564.1	Baia di Porto Conte, Sardinia, Italy
JX854796.1	Baia di Porto Conte, Sardinia, Italy
JX854795.1	Baia di Porto Conte, Sardinia, Italy
JX854794.1	Baia di Porto Conte, Sardinia, Italy
JX854793.1	Baia di Porto Conte, Sardinia, Italy
JX854792.1	Baia di Porto Conte, Sardinia, Italy
JX854791.1	Baia di Porto Conte, Sardinia, Italy
JX854790.1	Baia di Porto Conte, Sardinia, Italy
JX854789.1	Baia di Porto Conte, Sardinia, Italy
JX854788.1	Baia di Porto Conte, Sardinia, Italy
